# Supplementary material for: Single-particle correlation study: chemical interface damping induced by biotinylated proteins with sulfur in plasmonic gold nanorods
Source: Royal Society of Chemistry journal article supplement (doi:10.1039/c9cp01049a), 2019-01-01
Supplement: c9cp01049a1.pdf [file c9cp01049a1.pdf]

## **Electronic Supplementary Information**

*for*

### **Single-Particle Correlation Study: Chemical Interface Damping Induced by Biotinylated Proteins with Sulfur in Plasmonic Gold Nanorods**

Seong Woo Moon<sup>a</sup> and Ji Won Ha<sup>\*a</sup>

<sup>a</sup>Advanced Nano-Bio-Imaging and Spectroscopy Laboratory, Department of Chemistry,  
University of Ulsan, 93 Daehak-Ro, Nam-Gu, Ulsan 44610, South Korea

\*To whom correspondence should be addressed.

**J. W. Ha**

Phone: +82-52-712-8012

Fax: +82-52-712-8002

E-mail: [jwha77@ulsan.ac.kr](mailto:jwha77@ulsan.ac.kr)

This document contains additional supplementary figures (Fig. S1 to S6).

## Supplementary Figures

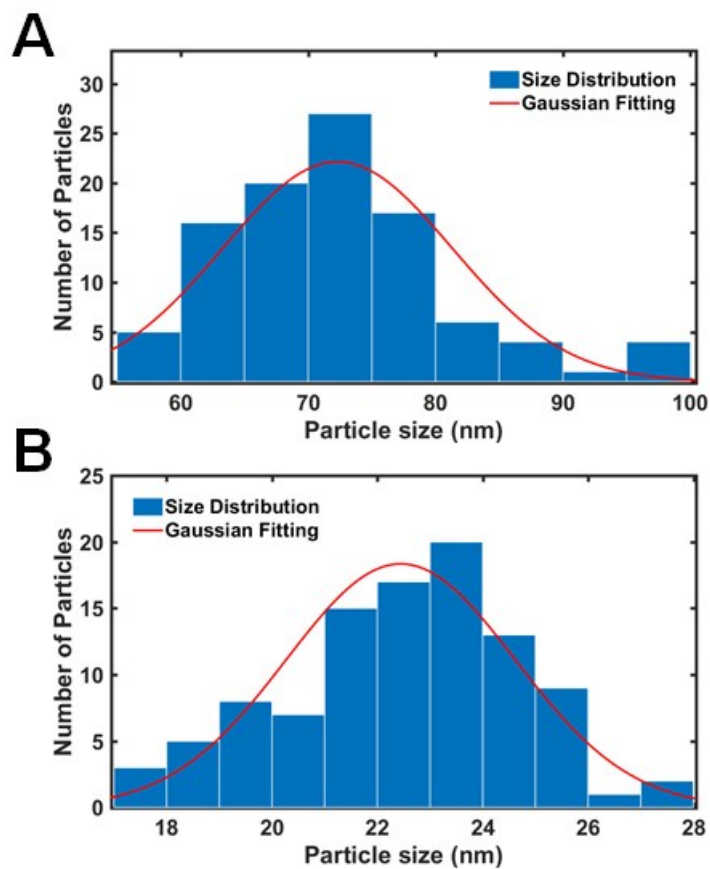

**Fig. S1 (A)** Histogram to show the size distribution in the length of AuNRs. **(B)** Histogram to show the size distribution in the width of AuNRs

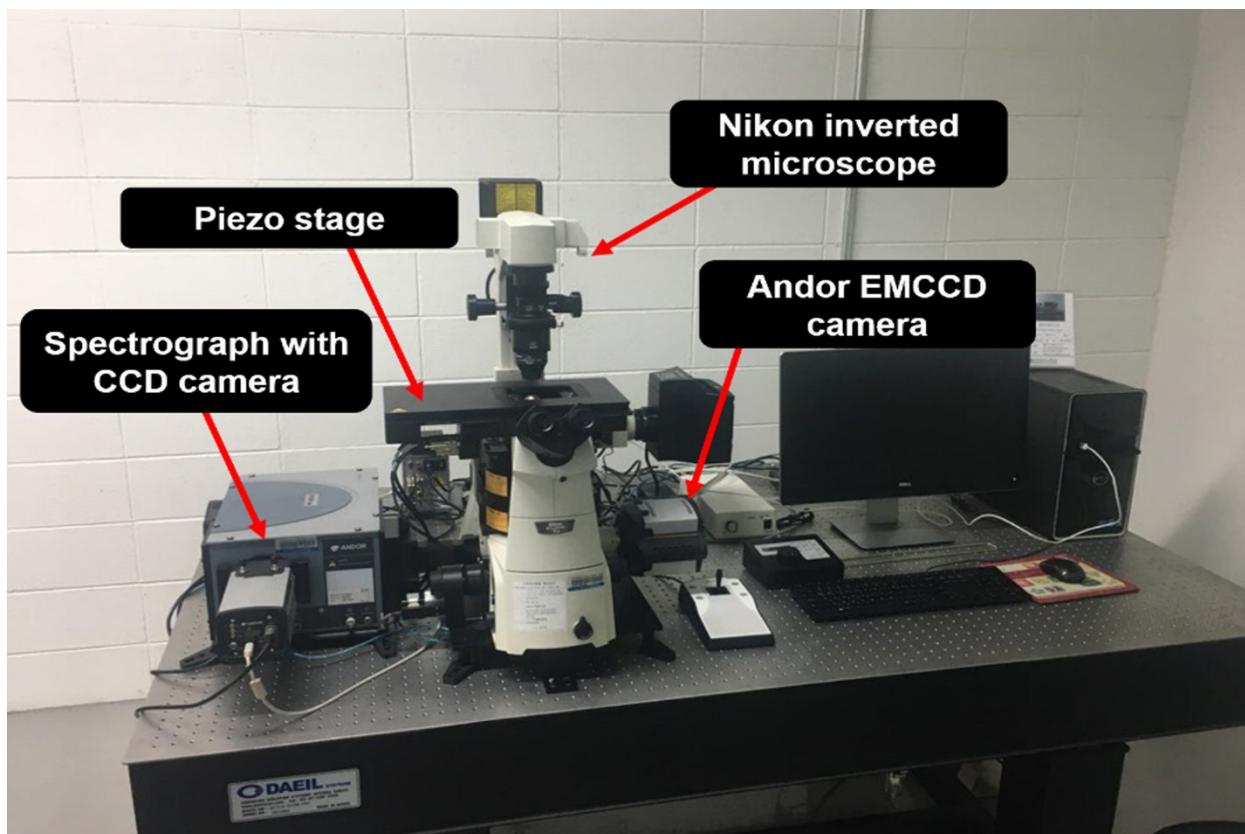

**Fig. S2** A photograph to show the experimental setup for DF microscopy and spectroscopy.

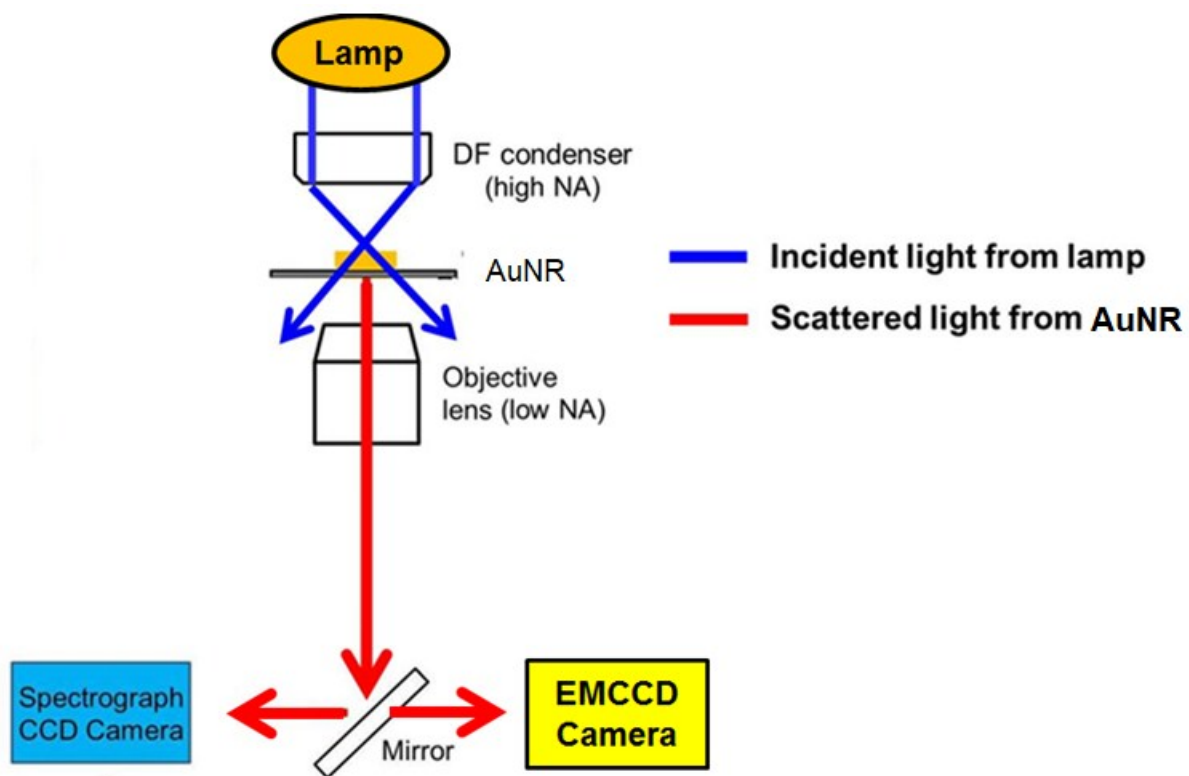

**Fig. S3** The working principle of scattering-based DF microscopy and spectroscopy.

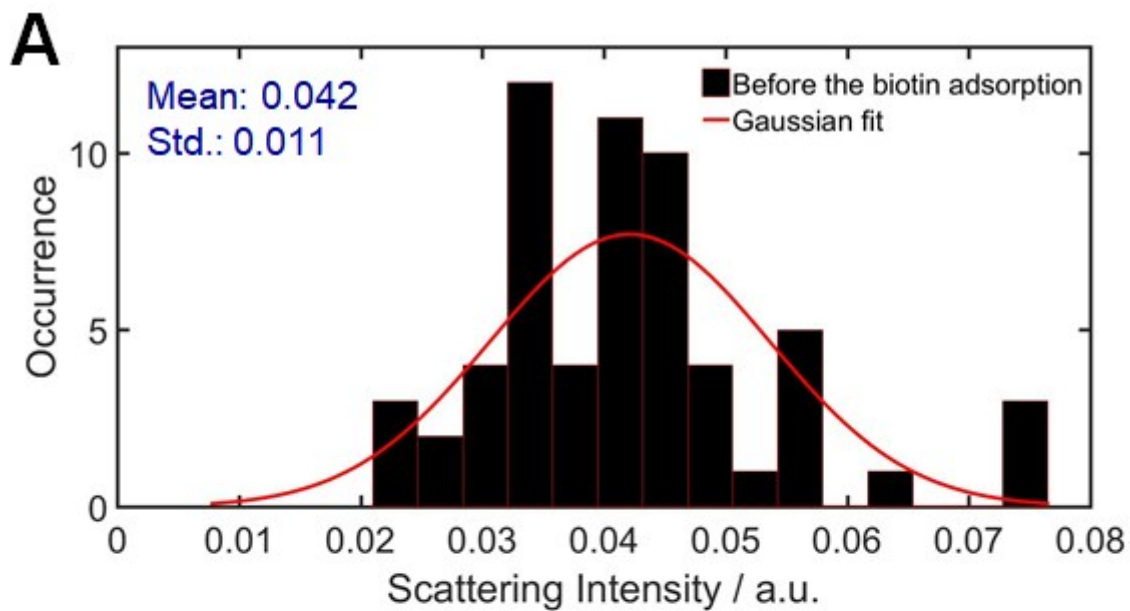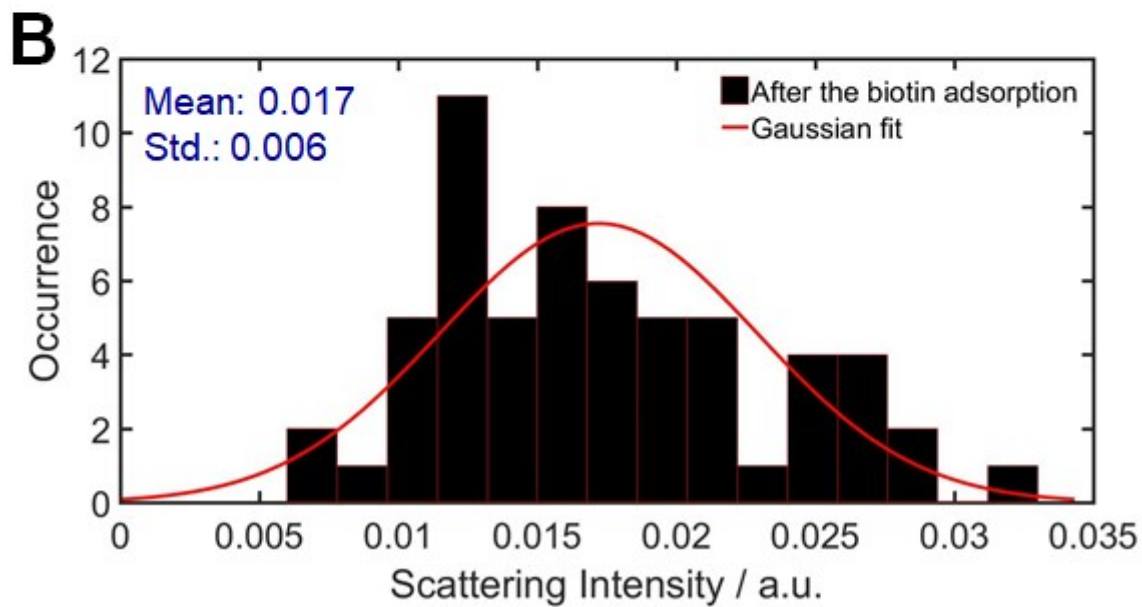

**Fig. S4** (A) Histogram of scattering intensity before adding the biotin molecules. (B) Histogram of scattering intensity after the biotin adsorption. 60 AuNRs were used to construct the intensity histograms in each case.

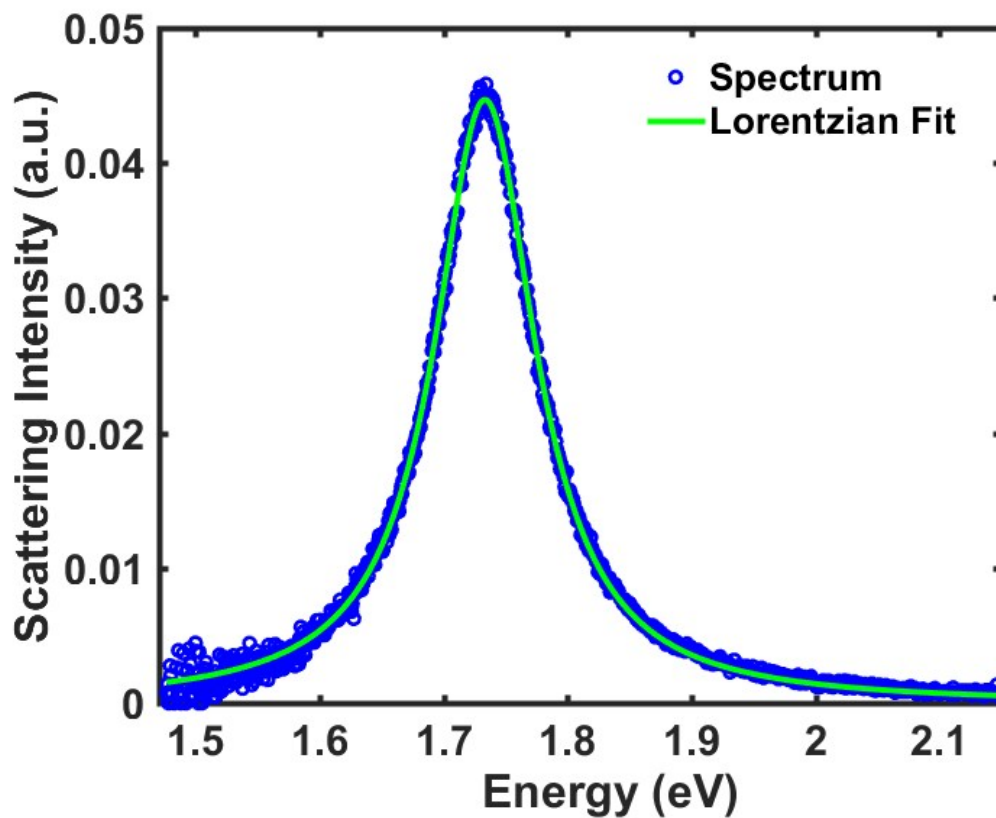

**Fig. S5** Fitting of experimental data with a Lorentzian function to calculate the LSPR linewidth  $\Gamma$  in eV. The scattering spectrum of a AuNR (AR=3.22, blue-color) was well fitted with the function (green-color).

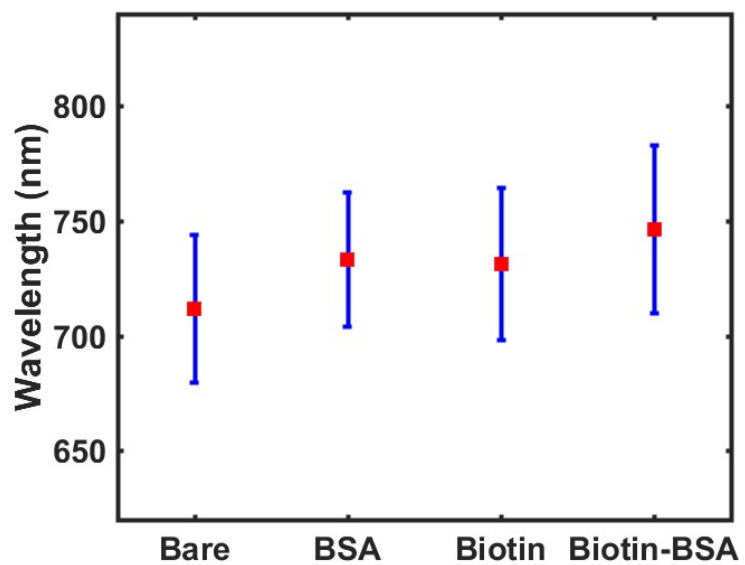

**Fig. S6** LSPR wavelength shifts caused by the adsorption of BSA, Biotin, Biotinylated BSA (Biotin-BSA) on single AuNRs. In this study, the bare AuNRs mean the absence of thiol and sulfur groups on their surfaces.
